# Supplementary material for: Highly active dinuclear cobalt complexes for solvent-free cycloaddition of CO2 to epoxides at ambient pressure
Source: Royal Society of Chemistry journal article supplement (doi:10.1039/c9cc02626f), 2019-01-01
Supplement: c9cc02626f1.pdf [file c9cc02626f1.pdf]

## Supporting Information

### Highly active dinuclear cobalt complexes for solvent-free cycloaddition of CO<sub>2</sub> to epoxides at ambient pressure

Zafar A. K. Khattak,<sup>a,b</sup> Hussein A. Younus, <sup>\*a,c</sup> Nazir Ahmad,<sup>a,d</sup> Habib Ullah,<sup>a,b</sup> Suleman Suleman,<sup>a,b</sup> Md. Shahadat Hossain,<sup>a, b, e</sup> Mirella Elkadi,<sup>g</sup> and Francis Verpoort <sup>\*a, b, f, g</sup>

<sup>a</sup> State Key Laboratory of Advanced Technology for Materials Synthesis and Processing, Wuhan University of Technology, Wuhan 430070, PR China.

<sup>b</sup> School of Materials Science and Engineering, Wuhan University of Technology, Wuhan 430070, PR China.

<sup>c</sup> Department of Chemistry, Faculty of Science, Fayoum University, Fayoum 63514, Egypt.

<sup>d</sup> Department of Chemistry, G. C. University Lahore, 54000, Pakistan.

<sup>e</sup> Department of Chemistry, Faculty of Science, Cumilla University, Cumilla 3506, Bangladesh

<sup>f</sup> National Research Tomsk Polytechnic University, Lenin Avenue 30, 634050 Tomsk, Russian Federation.

<sup>g</sup> College of Arts and Sciences, Khalifa University of Science and Technology, PO Box 127788, Abu Dhabi, UAE.

\* Corresponding author's E-mail: [francis.verpoort@ghent.ac.kr](mailto:francis.verpoort@ghent.ac.kr)

### Contents

|                                                                      |   |
|----------------------------------------------------------------------|---|
| 1. General comments.....                                             | 3 |
| 2. Synthesis.....                                                    | 3 |
| 2.1 Synthesis of ligands.....                                        | 3 |
| 2.2 Synthesis of cobalt complexes (1-3).....                         | 4 |
| 3. General catalytic procedure.....                                  | 5 |
| 4. Stability and recycling of the catalyst.....                      | 6 |
| 5. Optimization Table of the catalytic activity of Co-complexes..... | 6 |

|                                                                      |    |
|----------------------------------------------------------------------|----|
| 6. Comparison of the catalytic activity with reported complexes..... | 7  |
| 7. NMR spectra of ligands.....                                       | 7  |
| 8. Powder XRD of complex 2.....                                      | 11 |
| 9. FTIR spectra of ligands and complexes.....                        | 11 |
| 10. Mass spectra of dinuclear cobalt complexes.....                  | 13 |
| 11. NMR spectra of carbon dioxide fixation reactions.....            | 14 |
| 12. FTIR of the recycled complex.....                                | 20 |
| 13. References.....                                                  | 20 |

## 1. General comments

CoCl<sub>2</sub>·6H<sub>2</sub>O, salicylaldehyde, 2-hydroxy-4-methoxybenzaldehyde, 2-hydroxy-1-naphthaldehyde, 3,5-di-*tert*-butyl salicylaldehyde, tris(hydroxymethyl)aminomethane, *tertiary*-butylammonium bromide, triethylamine, and methanol were purchased from Aladdin and were used without any further purification. Nuclear Magnetic Resonance (NMR) spectra were recorded at room temperature using 500 MHz Bruker Advance III-HD at 500 MHz and 125 MHz for <sup>1</sup>H-NMR and <sup>13</sup>C-NMR, respectively. All chemical shifts are expressed in δ units (ppm). Fourier Transform Infrared (FT-IR) spectra were measured from KBr pellets using a Thermo-Nicolet 6700 spectrometer over the 4000-400 cm<sup>-1</sup> range.

## 2. Synthesis

### 2.1 Synthesis of ligands

The Schiff base ligands were synthesized according to the reported methods<sup>1</sup> *via* amine-aldehyde condensation. To the solution of salicylaldehyde or its derivatives (10 mmol) in methanol was added tris(hydroxymethyl)aminomethane (10 mmol, 1.21 g) and the reaction mixture was refluxed overnight at room temperature. On evaporation under reduced pressure, a yellow mass of the ligand was obtained, which was then dried under vacuum at room temperature.

**Ligand H<sub>4</sub>L<sup>1</sup>:** Yield: 81 %. <sup>1</sup>H-NMR (500 MHz, DMSO-*d*<sub>6</sub>): δ 14.52 [s, 1H, (O-H)<sub>phenolic</sub>], 8.57 [s, 1H, (N=C-H)<sub>imine</sub>], 7.41 [d, 1H, (Ar-H)], 7.28 [t, 1H, (Ar-H)], 6.79 [d, 2H, (Ar-H)], 4.73 [t, 3H, (O-H)<sub>alcoholic</sub>], 3.63 [d, 6H, (-CH<sub>2</sub>-)<sub>aliphatic</sub>] ppm. <sup>13</sup>C-NMR (125 MHz, DMSO-*d*<sub>6</sub>) δ 164.9 (Ar-C)<sub>phenolic</sub>, 163.7 (C=N)<sub>imine</sub>, 132.8 (Ar-C), 132.6 (Ar-C), 118.9 (Ar-C), 117.8 (Ar-C), 117.6 (Ar-C), 67.5 (-C(CH<sub>2</sub>)<sub>3</sub>-), 61.8 (-CH<sub>2</sub>-OH) ppm. **FT-IR Data [KBr,  $\bar{\nu}$  (cm<sup>-1</sup>):** 3600-3200 [br, (O-H)<sub>phenolic</sub>, alcoholic], 3066 [br, (C-H)<sub>sp2</sub> and (=C-H)<sub>imine</sub>], 2819 [m, (C-H)<sub>sp3</sub>], 1635, 1611 and 1539 [s, (C=C)<sub>aromatic</sub> and (C=N)<sub>imine</sub>], 1483 (m, CH<sub>2</sub> bending), 1230 [s, (C-O)<sub>phenolic</sub>], 1060 [s, (C-O)<sub>alcohol</sub>], 764 (s, CH<sub>2</sub> bending). Anal. Calcd. for C<sub>11</sub>H<sub>15</sub>NO<sub>4</sub>: C, 58.66; H, 6.71; N, 6.22%. Found: C, 58.73; H, 6.74; N, 6.17%.

**Ligand H<sub>4</sub>L<sup>2</sup>:** Yield: 89 %. <sup>1</sup>H-NMR (500 MHz, DMSO-*d*<sub>6</sub>) δ 14.27 [d, 1H, (O-H)<sub>phenolic</sub>] 8.27 [s, 1H, (N=C-H)<sub>imine</sub>], 7.16 [d, 1H, (Ar-H)], 6.12 [dd, 2.4 Hz, 1H, (Ar-H)], 6.04 [d, 1H, (Ar-H)],

4.93 [t, 3H, (O-H)<sub>alcoholic</sub>], 3.71 [s, 3H, (O-CH<sub>3</sub>)] 3.60 [s, 6H, (-CH<sub>2</sub>-)<sub>aliphatic</sub>] ppm. <sup>13</sup>C-NMR (125 MHz, DMSO- *d*<sub>6</sub>) δ 174.3 (Ar-C)<sub>phenolic</sub>, 165.3 (C=N)<sub>imine</sub>, 162.4 (Ar-C), 134.9 (Ar-C), 111.4 (Ar-C), 105.3 (Ar-C), 102.3 (Ar-C), 65.6 (-C(CH<sub>2</sub>)<sub>3</sub>-), 61.4 (-CH<sub>2</sub>-OH), 55.4 (-OCH<sub>3</sub>) ppm. **FT-IR Data [KBr,  $\bar{\nu}$  (cm<sup>-1</sup>)]:** 3500-3000 [m, br, (O-H)<sub>phenolic, alcoholic</sub>, (C-H)<sub>sp2</sub>, (N=C-H)<sub>imine</sub>], 2838 [m, (C-H)<sub>sp3</sub>], 1638, 1619 and 1525 [s, (C=C)<sub>aromatic</sub> and (C=N)<sub>imine</sub>], 1481 (s, CH<sub>2</sub> bending), 1358 (m, CH<sub>3</sub> bending), 1323 [s, (C-O)<sub>methoxy</sub>], 1227 [s, (C-O)<sub>phenolic</sub>], 1042 [s, (C-O)<sub>alcoholic</sub>], 788 (s, CH<sub>2</sub> bending). Anal. Calcd. for C<sub>12</sub>H<sub>17</sub>NO<sub>5</sub>: C, 56.46; H, 6.71; N, 5.49%. Found: C, 56.59; H, 6.79; N, 5.51%.

**Ligand H<sub>4</sub>L<sup>3</sup>:** Yield: 90 %. <sup>1</sup>H-NMR (500 MHz, DMSO- *d*<sub>6</sub>) δ 14.04 [d, 1H, (O-H)<sub>phenolic</sub>], 8.91 [s, 1H, (N=C-H)<sub>imine</sub>], 7.95 [d, 1H, (Ar-H)], 7.68 [d, 1H, (Ar-H)], 7.60 [d, 1H, (Ar-H)], 7.41 [t, 1H, (Ar-H)], 7.16 [t, 1H, (Ar-H)], 6.64 [d, 1H, (Ar-H)], 5.13 [t, 3H, (O-H)<sub>alcoholic</sub>], 3.66 [d, 6H, (-CH<sub>2</sub>-)<sub>aliphatic</sub>] ppm. <sup>13</sup>C-NMR (125 MHz, DMSO- *d*<sub>6</sub>) δ 179.7 (Ar-C)<sub>phenolic</sub>, 156.1 (C=N)<sub>imine</sub>, 137.7 (Ar-C), 135.3 (Ar-C), 129.3 (Ar-C), 128.3 (Ar-C), 127.2 (Ar-C), 125.3 (Ar-C), 122.4 (Ar-C), 118.5 (Ar-C), 105.6 (Ar-C), 64.9 (-C(CH<sub>2</sub>)<sub>3</sub>-), 61.3 (-CH<sub>2</sub>-OH) ppm. **FT-IR Data [KBr,  $\bar{\nu}$  (cm<sup>-1</sup>)]:** 3500-3000 [m, br, (O-H)<sub>phenolic, alcoholic</sub>, (C-H)<sub>sp2</sub> and (N=C-H)<sub>imine</sub>], 2924 [m, (C-H)<sub>sp3</sub>], 1635 and 1542 [s, (C=C)<sub>aromatic</sub> and (C=N)<sub>imine</sub>], 1490 (m, CH<sub>2</sub> bending), 1171 [w, (C-O)<sub>aromatic</sub>], 1023 [s, (C-O)<sub>alcoholic</sub>], 750 (s, CH<sub>2</sub> bending). Anal. Calcd. for C<sub>15</sub>H<sub>17</sub>NO<sub>4</sub>: C, 65.44; H, 6.22; N, 5.09%. Found: C, 65.48; H, 6.31; N, 5.15%.

## 2.2 Synthesis of cobalt complexes (1-3)

Cobalt-Schiff base complexes were synthesized by the dropwise addition of CoCl<sub>2</sub>·6H<sub>2</sub>O solution (1 mmol, 0.23 g in 10 mL methanol) to the solution of the ligand (1 mmol) in 10 mL methanol. The solution was then stirred for 24 hours at room temperature. The dark brown solution was filtered, and the precipitate obtained was washed with acetone and dried under vacuum at room temperature.

**Complex 1**, [Co(HL<sup>1</sup>)<sub>2</sub>]: Yield: 73%. **FT-IR Data [KBr,  $\bar{\nu}$  (cm<sup>-1</sup>)]:** 3600-3000 [m, br, (O-H)<sub>alcoholic</sub>, (C-H)<sub>sp2</sub> and (N=C-H)<sub>imine</sub>], 2866 [w, (C-H)<sub>sp3</sub>], 1633, 1595 and 1547 [s, (C=C)<sub>aromatic</sub> and (C=N)<sub>imine</sub>], 1446 (m, CH<sub>2</sub> bending), 1275 [m, (C-O)<sub>phenolic</sub>], 1031 [s, (C-O)<sub>alcoholic</sub>] 756 (s, CH<sub>2</sub> bending). Anal. Calcd. for C<sub>22</sub>H<sub>26</sub>ClCo<sub>2</sub>N<sub>2</sub>O<sub>9</sub>: C, 42.91; H, 5.76; N, 4.55%. Found: C, 43.01; H, 5.83; N, 4.46%. **ESI-MS** (negative mode): *m/z* = 597.9931 [(Co<sub>2</sub>(H<sub>2</sub>L<sup>1</sup>)(HL<sup>1</sup>)]<sup>-</sup> (calc.

597.9969);  $m/z = 505.0993$   $[(\text{Co}(\text{H}_2\text{L}^1)_2)^-]$  (calc. 505.1027);  $m/z = 328.1166$   $[(\text{Co}(\text{H}_2\text{L}^1)(\text{C}_2\text{H}_5\text{OH})]$  (calc. 328.0595).

**Complex 2**,  $[\text{Co}(\text{HL}^2)]_2$ : Yield: 65%. **FT-IR Data [KBr,  $\bar{\nu}$  ( $\text{cm}^{-1}$ )]:** 3600-3000 [m, br, (O-H)<sub>alcoholic</sub>, (N=C-H)<sub>imine</sub>], 2857 [m, (C-H)<sub>sp3</sub>], 1630, 1601 and 1543 [s, (C=C)<sub>aromatic</sub> and (C=N)<sub>imine</sub>], 1485 (m, CH<sub>2</sub> bending), 1360 (m, CH<sub>3</sub> bending), 1288 [s, (C-O)<sub>methoxy</sub>], 1227 [s, (C-O)<sub>phenolic</sub>], 1025 [s, (C-O)<sub>alcoholic</sub>], 799 (w, CH<sub>2</sub> bending). Anal. Calcd. for C<sub>24</sub>H<sub>30</sub>ClCo<sub>2</sub>N<sub>2</sub>O<sub>11</sub>: C, 42.65; H, 4.47; N, 4.15%. Found: C, 42.74; H, 4.58; N, 4.06%. **ESI-MS (negative mode):**  $m/z = 658.0127$   $[(\text{Co}_2(\text{H}_2\text{L}^2)(\text{HL}^2)^-]$  (calc. 658.0180);  $m/z = 565.1194$   $[(\text{Co}(\text{H}_2\text{L}^2)_2)^-]$  (calc. 565.1238);  $m/z = 346.9943$   $[(\text{Co}(\text{H}_2\text{L}^2)\text{Cl})]$  (calc. 346.9971).

**Complex 3**,  $[\text{Co}(\text{HL}^3)]_2$ : Yield: 66%. **FT-IR Data [KBr,  $\bar{\nu}$  ( $\text{cm}^{-1}$ )]:** 3600-3000 [m, br, (O-H)<sub>alcoholic</sub>, (N=C-H)<sub>imine</sub>], 2934 [m, br, (C-H)<sub>sp3</sub>], 1626 (s) and 1539 (w) [(C=C)<sub>aromatic</sub> and (C=N)<sub>imine</sub>], 1460 (m, CH<sub>2</sub> bending), 1178 [s, (C-O)<sub>aromatic</sub>], 1040 [s, (C-O)<sub>alcoholic</sub>], 742 (s, CH<sub>2</sub> bending). Anal. Calcd. for C<sub>30</sub>H<sub>30</sub>ClCo<sub>2</sub>N<sub>2</sub>O<sub>9</sub>: C, 50.33; H, 4.22; N, 3.91%. Found: C, 50.46; H, 4.31; N, 3.87 **ESI-MS (negative mode):**  $m/z = 698.0222$   $[(\text{Co}_2(\text{H}_2\text{L}^3)(\text{HL}^3)^-]$  (calc. 698.0282);  $m/z = 605.1292$   $[(\text{Co}(\text{H}_2\text{L}^3)_2)^-]$  (calc. 605.1340);  $m/z = 402.9758$   $[(\text{Co}(\text{H}_3\text{L}^3)\text{Cl}_2)]$  (calc. 402.9794);  $m/z = 366.9994$   $[(\text{Co}(\text{H}_3\text{L}^3)\text{Cl})]$  (calc. 367.0022).

### 3. General catalytic procedure

In a typical coupling reaction of epoxides and CO<sub>2</sub>, a 30 mL stainless steel autoclave with a magnetic stirrer was charged with an appropriate ratio of catalyst, cocatalyst, and substrate and connected to CO<sub>2</sub> cylinder. After purging the autoclave at gentle pressure of CO<sub>2</sub> the outlet was closed and the pressure was set to 1 bar from CO<sub>2</sub> cylinder once the temperature of the autoclave (reactor) reached to the appropriate temperature of the oil bath. After the allotted reaction time, the autoclave was cooled to room temperature. After carefully removing the excess of CO<sub>2</sub>, a small amount of the reaction mixture was taken from the autoclave for <sup>1</sup>H-NMR analysis in CDCl<sub>3</sub> to quantitatively give the conversion rate of the substrate used. The different substrates (epoxides) used in this study are: epichlorohydrin (10 mmol, 0.93 g), allyl glycidyl ether (10 mmol, 1.14 g), butyl glycidyl ether (10 mmol, 1.3 g), benzyl glycidyl ether (10 mmol, 1.6 g), glycidyl isopropyl ether (10 mmol, 1.2 g), vinyl oxirane (10 mmol, 0.70 g), styrene oxide (10 mmol, 1.2 g), propylene oxide (10 mmol, 0.58 g), 1,2-epoxyhexane (10 mmol, 1.0 g), isobutylene oxide (10 mmol, 0.7 g),

3,6-Dioxabicyclo [3,1.0] hexane (10 mmol, 0.98 g), cyclopentene oxide (10 mmol, 0.98 g), and cyclohexene oxide (10 mmol, 0.98 g).

## 4. Stability and recycling of the catalyst

The recyclability and hence stability of the catalysts were carried out using epichlorohydrin as a substrate. 1 mol% of the catalyst (0.05 mmol) and epichlorohydrin (5 mmol, 0.463g) was taken in an autoclave with a stirrer and connected to CO<sub>2</sub> cylinder. After purging with CO<sub>2</sub> for a few seconds at room temperature the pressure was set to 1 bar when the reactor temperature reach to 120 °C in an oil bath. After the given reaction time, the conversion of the substrate into the product was analyzed by <sup>1</sup>H-NMR in CDCl<sub>3</sub> and the catalyst was recovered from the reaction mixture by adding acetone, which helps in the precipitation of the catalyst, and doing centrifugation. The catalyst was washed with acetone and dried in vacuum at 60 °C before using for the next cycle. The catalyst was characterized by FT-IR after each cycle.

## 5. Optimization Table of the catalytic activity of Co-complexes

Table S1. Optimizing conditions for the cycloaddition of CO<sub>2</sub> and epichlorohydrin at 1 bar

| Entry              | Catalyst                      | Cat. : Cocat. : Substrate | T (°C) | Time (h) | Conversion (%) | TON  | TOF (h <sup>-1</sup> ) |
|--------------------|-------------------------------|---------------------------|--------|----------|----------------|------|------------------------|
| 1                  | H <sub>4</sub> L <sup>1</sup> | 1: 0: 1000                | 120    | 6        | 6.5            | 65   | 11                     |
| 2                  | H <sub>4</sub> L <sup>2</sup> | 1: 0: 1000                | 120    | 6        | 9              | 90   | 15                     |
| 3                  | H <sub>4</sub> L <sup>3</sup> | 1: 0: 1000                | 120    | 6        | 12             | 120  | 20                     |
| 4                  | <b>1</b>                      | 1: 0: 1000                | 120    | 6        | 22             | 220  | 37                     |
| 5                  | <b>2</b>                      | 1: 0: 1000                | 120    | 6        | 25             | 250  | 42                     |
| 6                  | <b>3</b>                      | 1: 0: 1000                | 120    | 6        | 19             | 190  | 32                     |
| 7                  | <b>2</b>                      | 1: 0: 100                 | 120    | 6        | 100            | 1000 | 167                    |
| 8 <sup>a</sup>     | -                             | 0: 1: 1000                | 120    | 6        | 66             | 660  | 110                    |
| 9 <sup>b</sup>     | -                             | 0: 1: 1000                | 120    | 6        | 61             | 610  | 102                    |
| 10 <sup>a, c</sup> | <b>2</b>                      | 1: 1: 1000                | 120    | 5        | 100            | 1000 | 200                    |

<sup>a</sup> DMAP was used as cocatalyst, <sup>b</sup> TBAB was used as cocatalyst, <sup>c</sup> carried out at 10 bar pressure of CO<sub>2</sub>. TON and TOF values are calculated per mole of complex.

## 6. Comparison of the catalytic activity with reported complexes

**Table S2.** Comparison of TON and TOF values for cycloaddition of CO<sub>2</sub> to epoxides of this study with the reported literature.

| Entry           | Catalyst <sup>a</sup> | Cocatalyst | Temp. (°C) | P (bar) | TON     | TOF (h <sup>-1</sup> ) | Reference |
|-----------------|-----------------------|------------|------------|---------|---------|------------------------|-----------|
| 1 <sup>b</sup>  | Cobalt, (2)           | TBAB       | 120        | 1       | 168,600 | 3333                   | This work |
| 2 <sup>c</sup>  | Cobalt                | -          | 120        | 20      | 2,930   | 122                    | 2         |
| 3 <sup>c</sup>  | Cobalt                | DMAP       | 130        | 20      | 1,986   | 662                    | 3         |
| 4 <sup>c</sup>  | Cobalt                | TBAB       | 25         | 34      | 2025    | 169                    | 4         |
| 5 <sup>b</sup>  | Cobalt                | DMAP       | 100        | 16      | 716     | 358                    | 5         |
| 6 <sup>c</sup>  | Cobalt                | TPPB       | 120        | 20      | 888     | 296                    | 6         |
| 7 <sup>b</sup>  | Cobalt                | DMAP       | 100        | 16      | 886     | 443                    | 7         |
| 8 <sup>b</sup>  | Cobalt                | DMAP       | 100        | 16      | 832     | 416                    | 7         |
| 9 <sup>d</sup>  | Cobalt                | TBAB       | 130        | 5       | 1756    | 73                     | 8         |
| 10 <sup>d</sup> | Cobalt                | TBAB       | 130        | 5       | 1461    | 61                     | 8         |
| 11 <sup>c</sup> | Cobalt                | TBAB       | 20         | 1       | 119     | 20                     | 9         |
| 12 <sup>c</sup> | Aluminium             | PPNBr      | 90         | 10      | 10,000  | 36,000                 | 10        |
| 13 <sup>c</sup> | Aluminium             | PPNCl      | 120        | 30      | 92,500  | 185,000                | 11        |
| 14 <sup>c</sup> | Magnesium             | -          | 120        | 17      | 138,000 | 19,000                 | 12        |
| 15 <sup>c</sup> | Magnesium             | -          | 120        | 17      | 220,000 | 46,000                 | 13        |
| 16 <sup>c</sup> | Iron                  | TBAB       | 120        | 20      | 3,480   | 5,200                  | 14        |
| 17 <sup>c</sup> | Iron                  | -          | 120        | 10      | 7,900   | 7,900                  | 15        |
| 18 <sup>c</sup> | Zinc                  | -          | 120        | 17      | 310,000 | 40,000                 | 13        |
| 19 <sup>c</sup> | Zinc                  | -          | 120        | 17      | 240,000 | 2,000                  | 16        |

<sup>a</sup> Only the metal centre is mentioned here instead of the whole complex. <sup>b</sup> epichlorohydrin substrate; <sup>c</sup> propylene oxide substrate; <sup>d</sup> Styrene epoxide substrate, <sup>e</sup> 1,2-epoxyhexane substrate, ( TBAB = tetrabutylammonium bromide, DMAP = 4-dimethylamino pyridine, TPPB = tetraphenyl phosphonium bromide, PPNBr = bis(triphenylphosphoranylidene)ammonium bromide, PPNCl = bis(triphenylphosphoranylidene)ammonium chloride).

## 7. NMR Spectra of Ligands

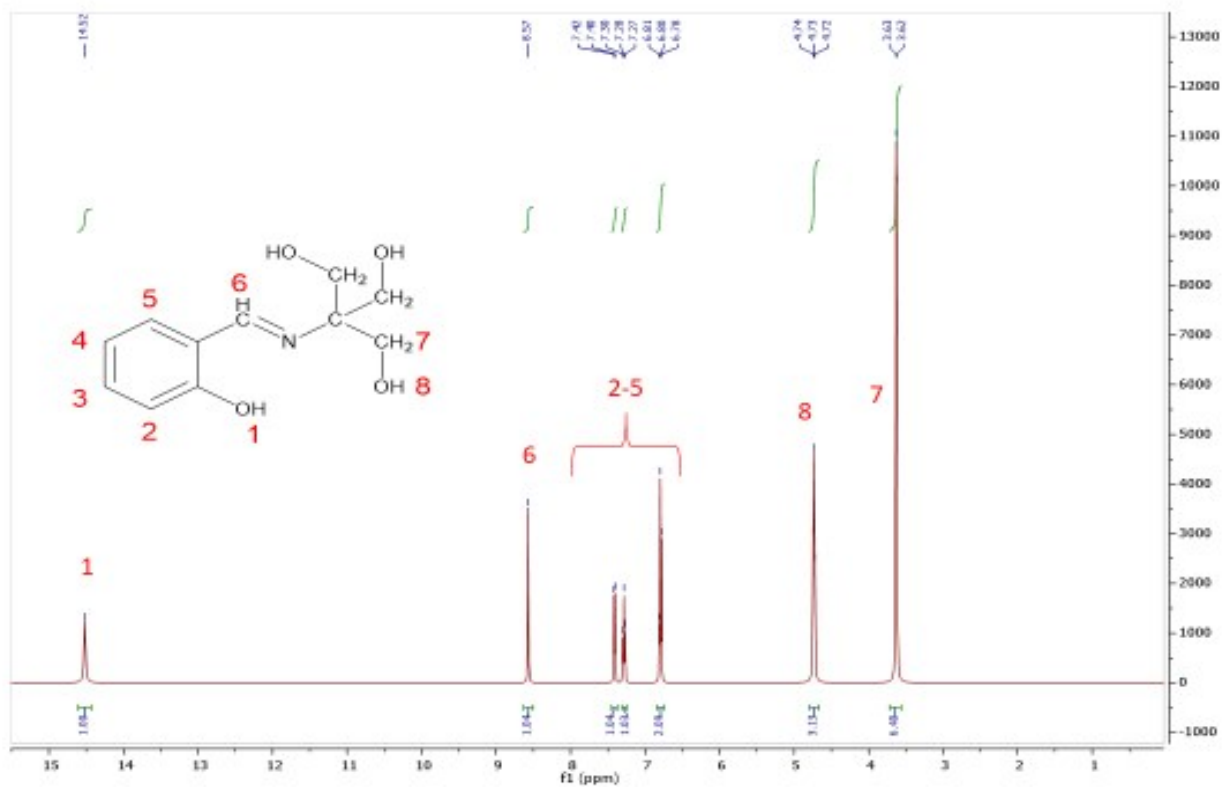

Fig. S1:  $^1H$ -NMR Spectrum of Ligand,  $H_4L^1$

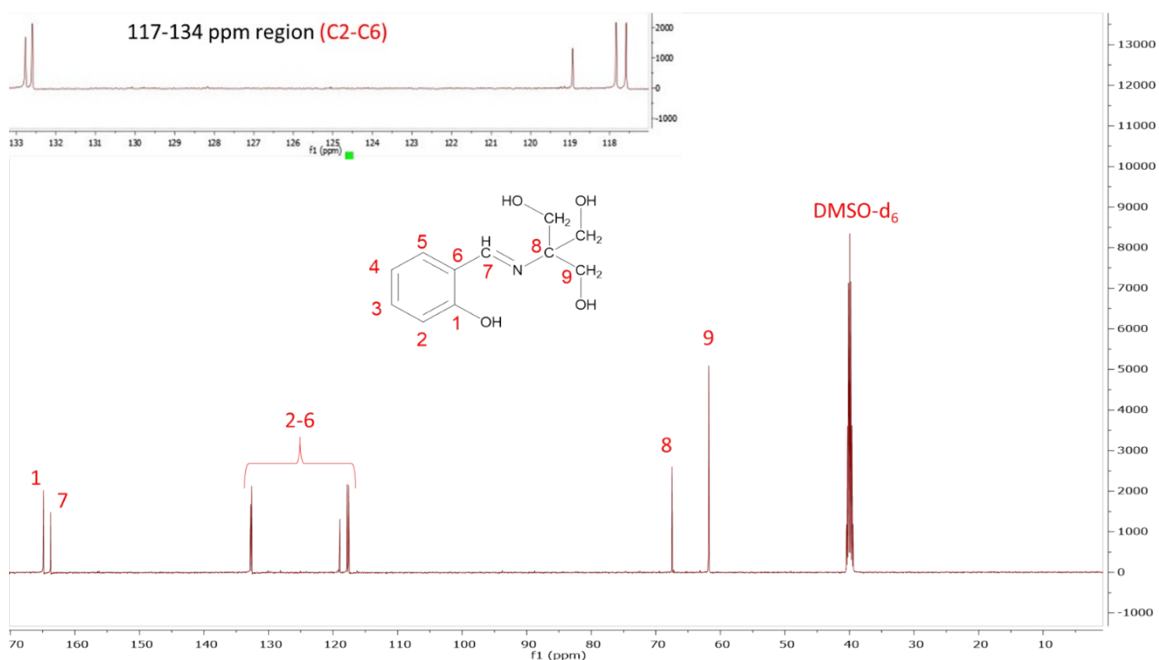

Fig. S2:  $^{13}C$ -NMR Spectrum of Ligand,  $H_4L^1$



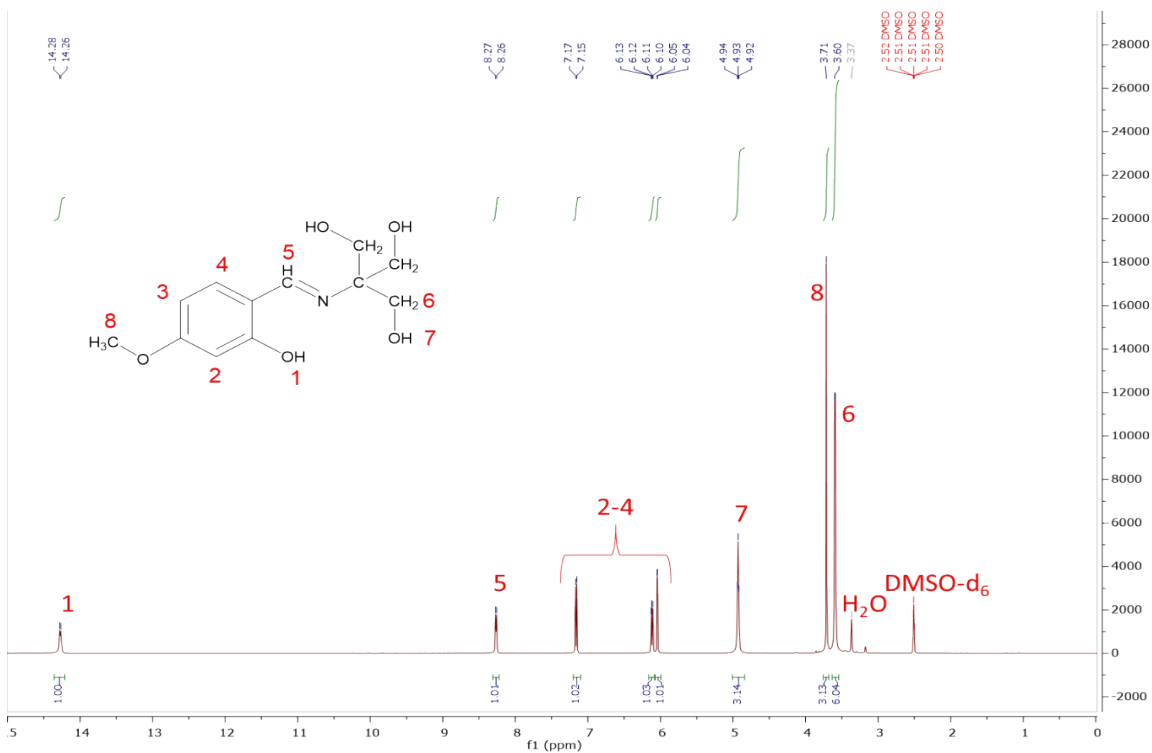

Fig. S3:  $^1H$ -NMR Spectrum of Ligand,  $H_4L^2$

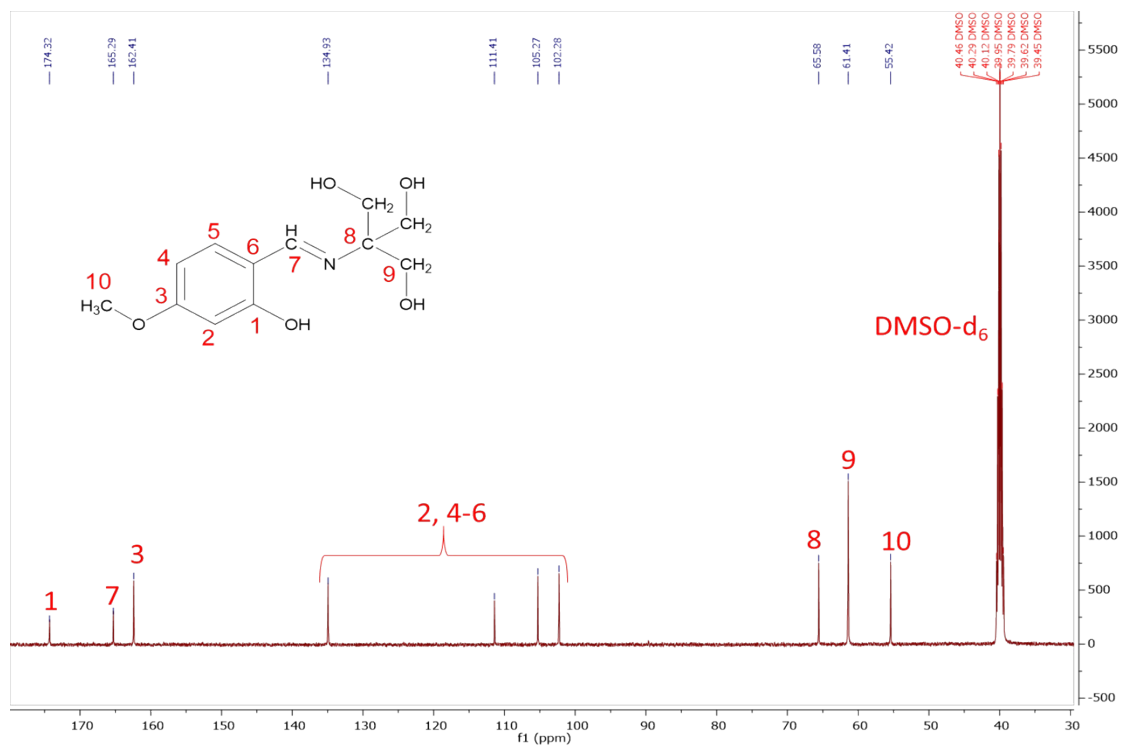

Fig. S4:  $^{13}C$ -NMR Spectrum of Ligand,  $H_4L^2$

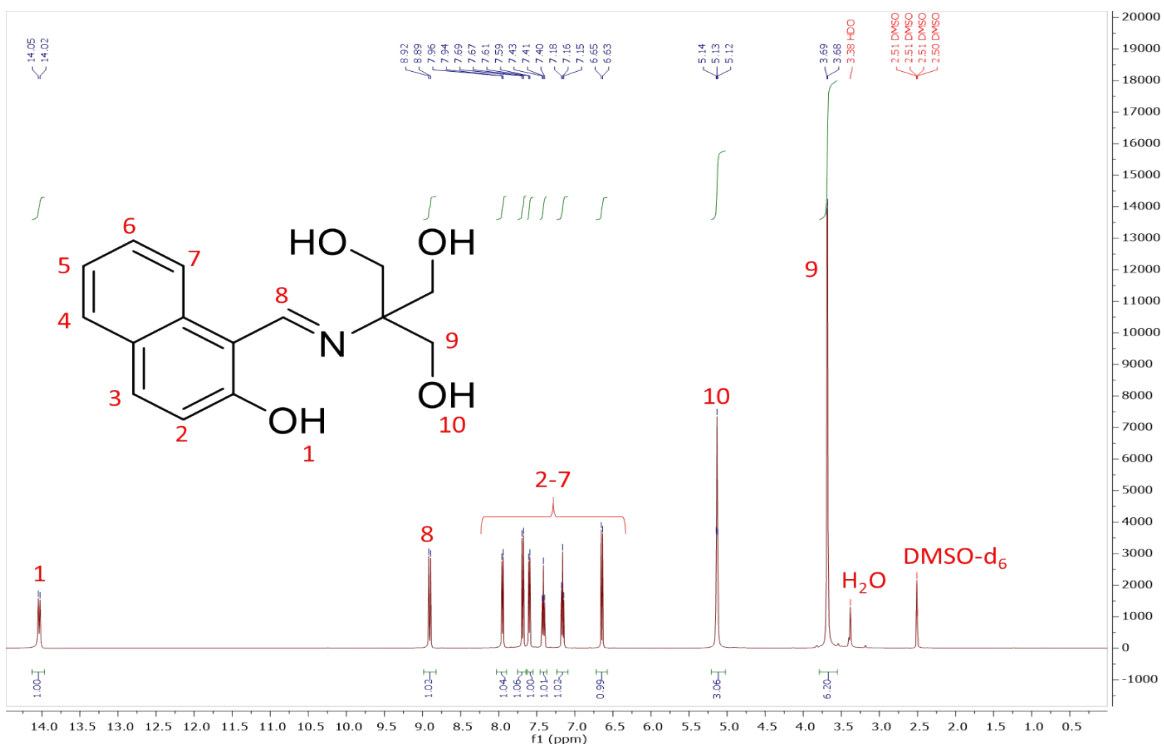

Fig. S5:  $^1H$ -NMR Spectrum of Ligand,  $H_4L^3$

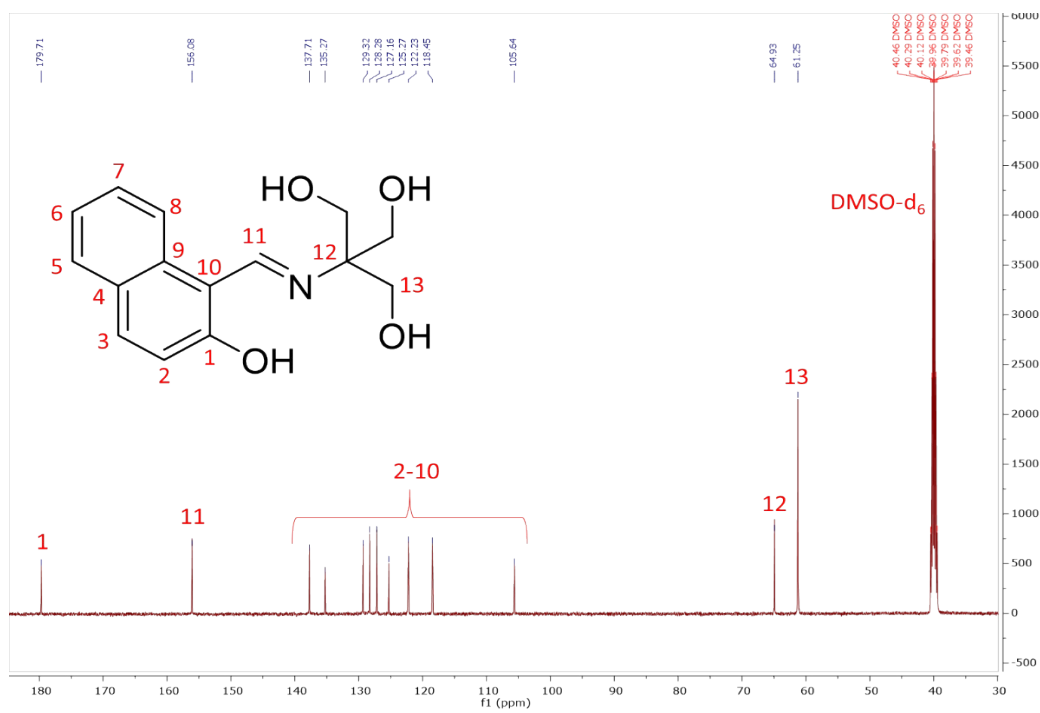

Fig. S6:  $^{13}C$ -NMR Spectrum of Ligand,  $H_4L^3$

## 8. Powder XRD of complex 2

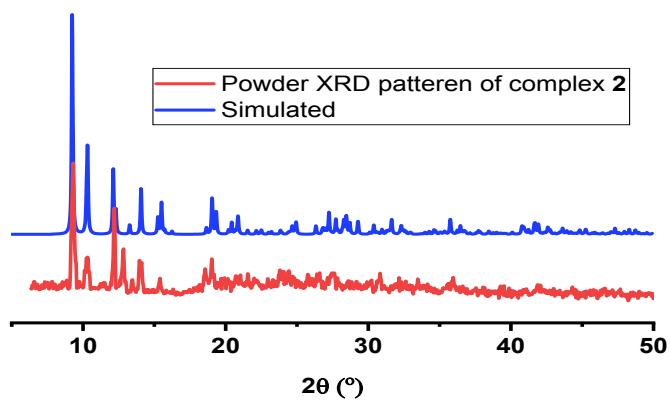

**Fig. S7** Diffractograms of the Co-complex (**2**), simulated standard pattern of CCDC 1027789<sup>1b</sup> (Blue) and that of the as-synthesized compound in this study (Red).

## 9. FTIR spectra of ligands and complexes

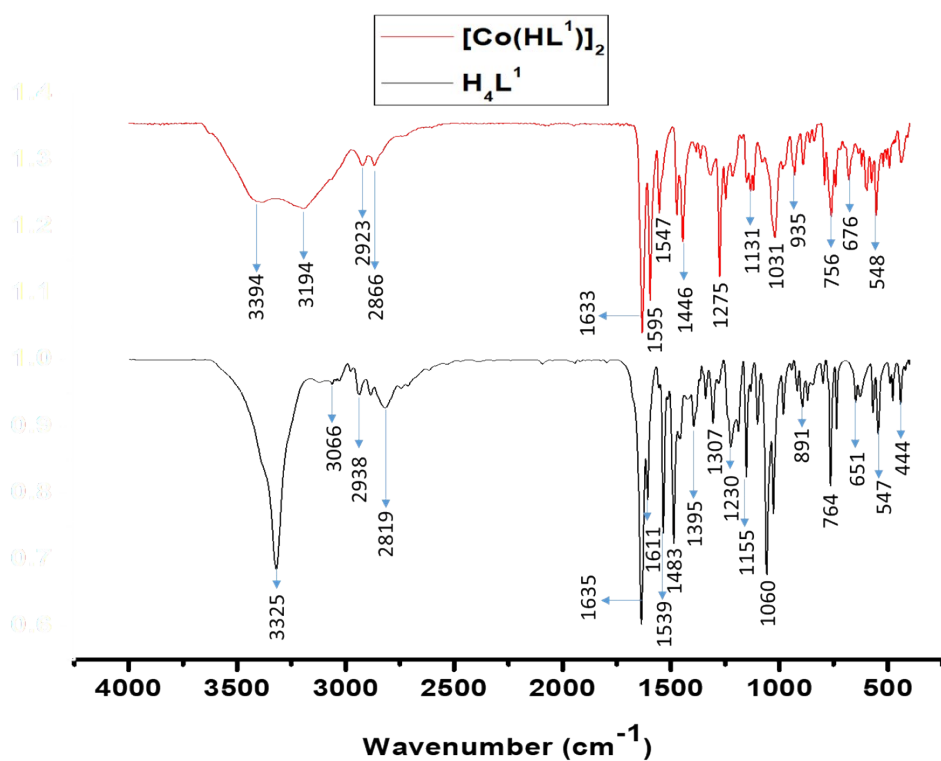

**Fig. S8:** FT-IR Spectrum of Ligand ( $\text{H}_4\text{L}^1$ ) and Co-complex,  $[\text{Co}(\text{HL}^1)]_2$

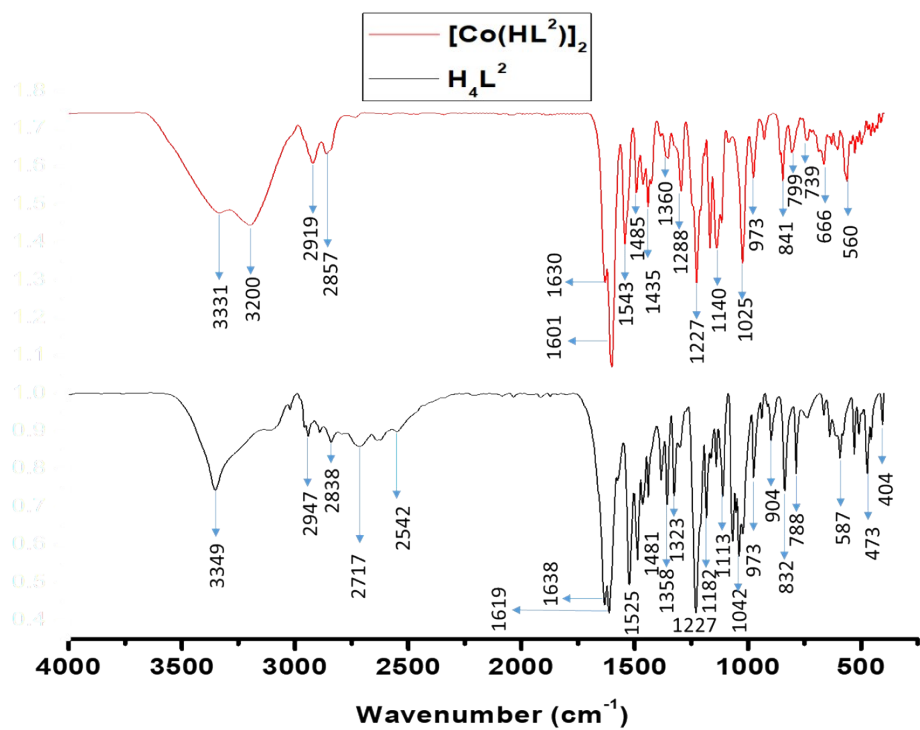

Fig. S9: FT-IR Spectrum of Ligand ( $H_4L^2$ ) and Co-complex,  $[Co(HL^2)_2]_2$

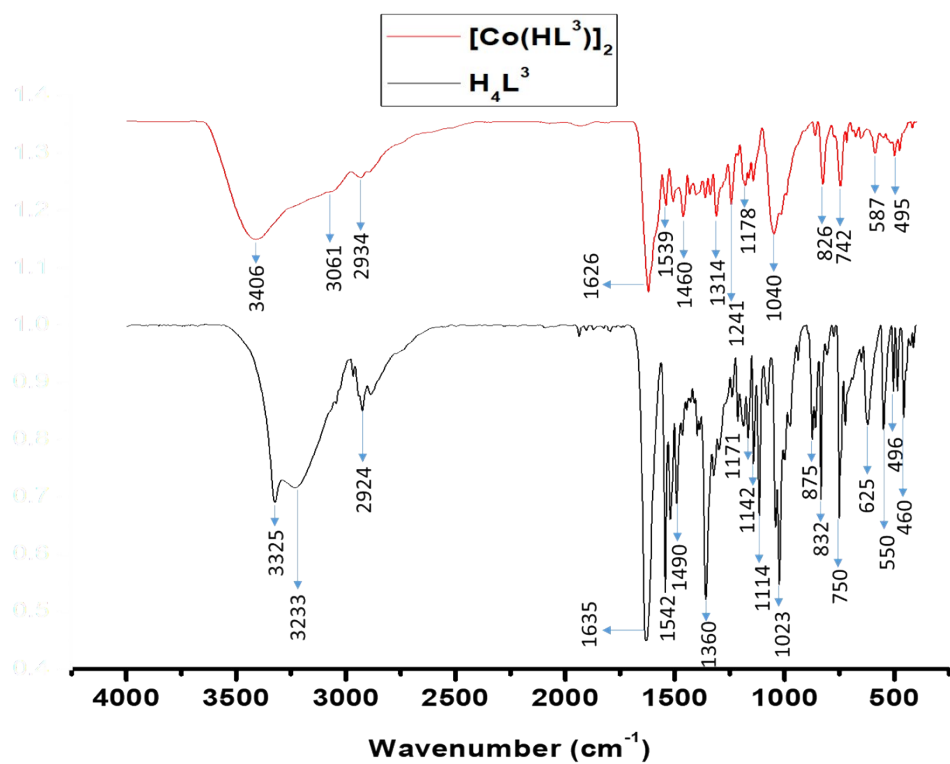

Fig. S10: FT-IR Spectrum of Ligand ( $H_4L^3$ ) and Co-complex,  $[Co(HL^3)_2]_2$

## 10. Mass spectra of dinuclear cobalt complexes

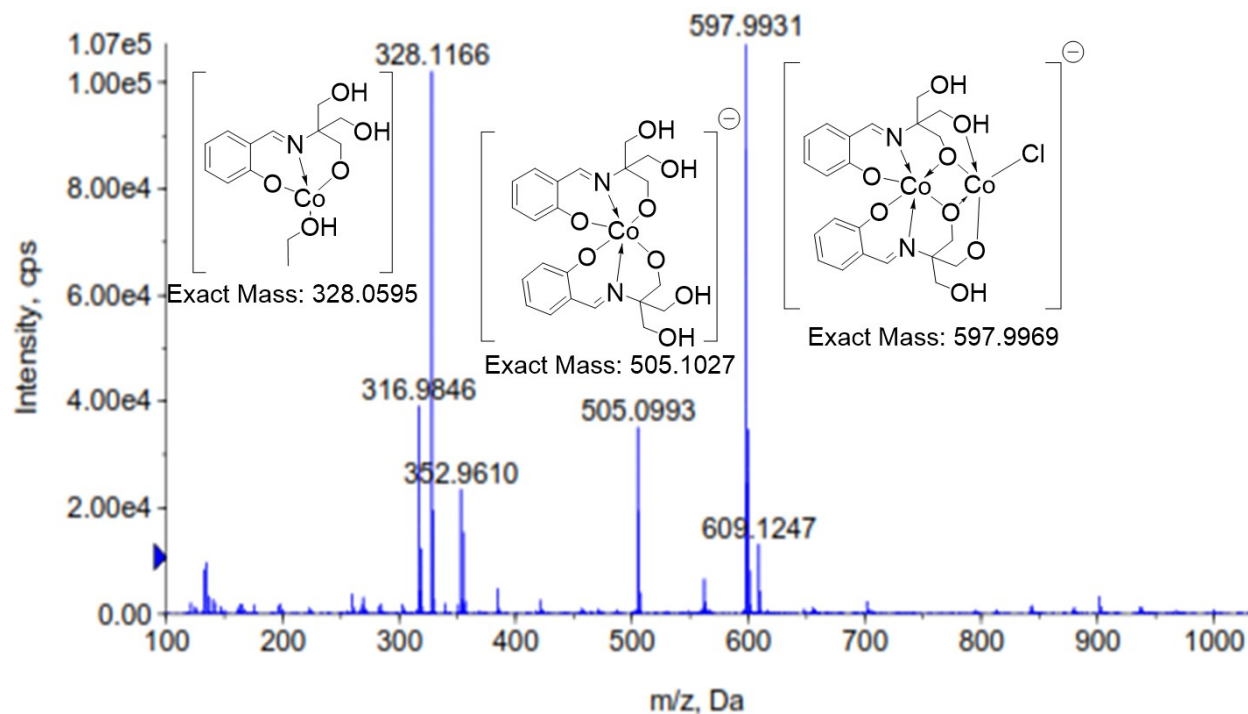

Fig. S11: Mass Spectrum complex 1,  $[\text{Co}(\text{H}_2\text{L}^1)]_2$

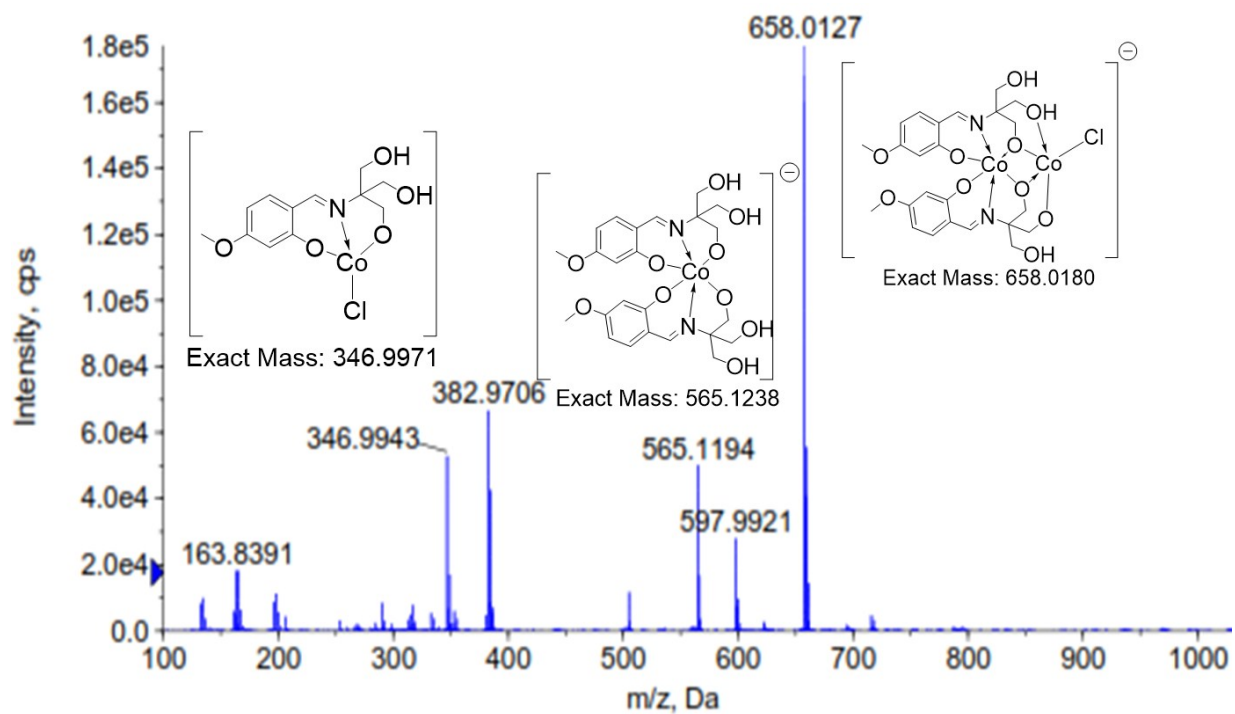

Fig. S12: Mass Spectrum complex 2,  $[\text{Co}(\text{H}_2\text{L}^2)]_2$

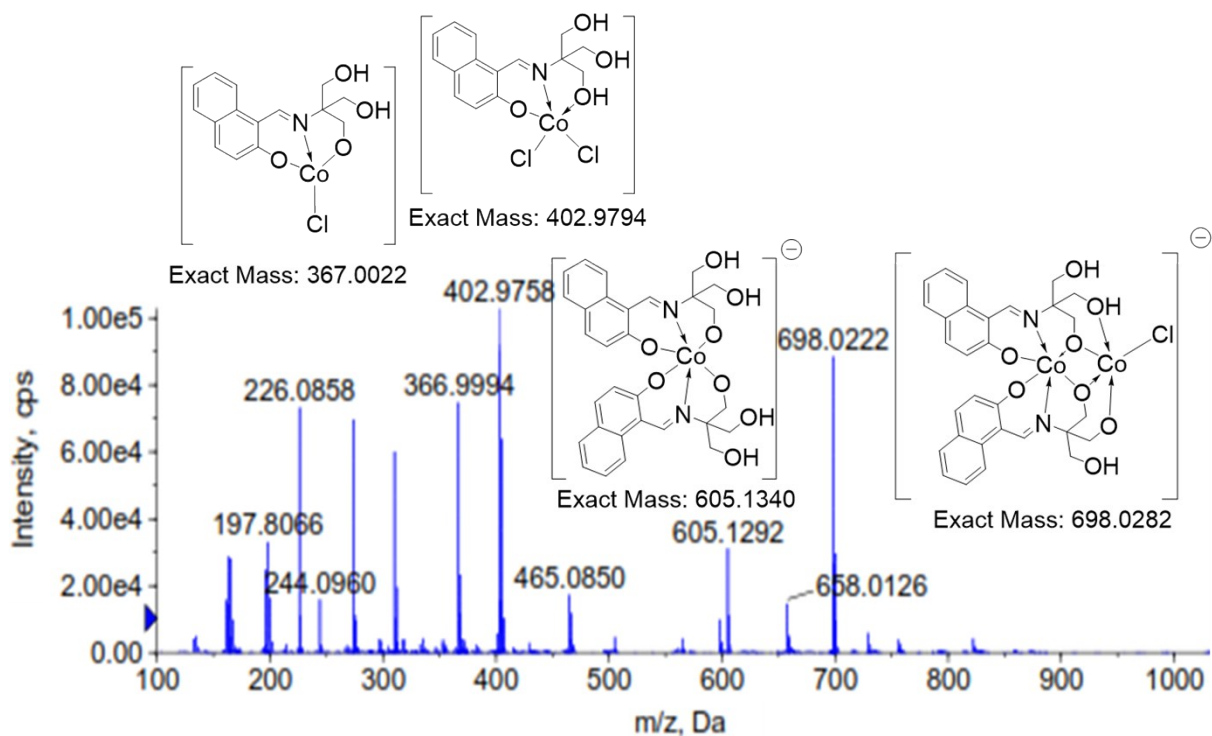

Fig. S13: Mass Spectrum complex 3,  $[\text{Co}(\text{H}_2\text{L}^3)]_2$

## 11. NMR spectra of carbon dioxide fixation reactions

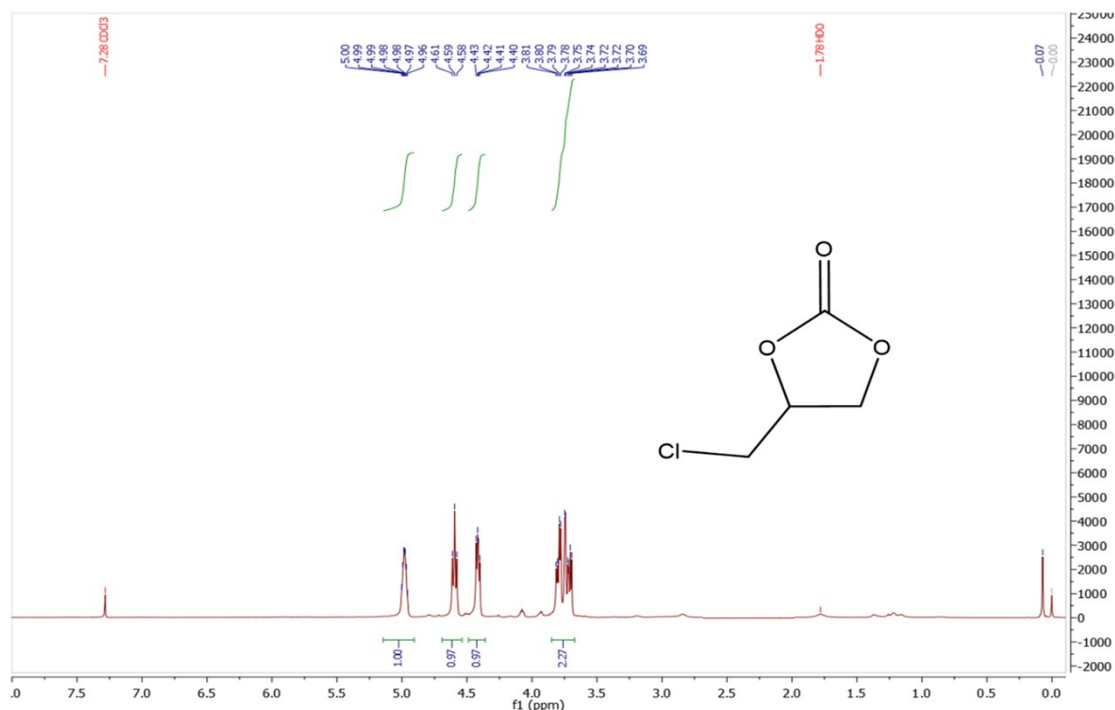

Fig. S14:  $^1\text{H}$ -NMR spectrum in  $\text{CDCl}_3$  of the crude product [4-(chloromethyl)-1,3-dioxolan-2-one] obtained from the conversion of epichlorohydrin using complex 2 as a catalyst.

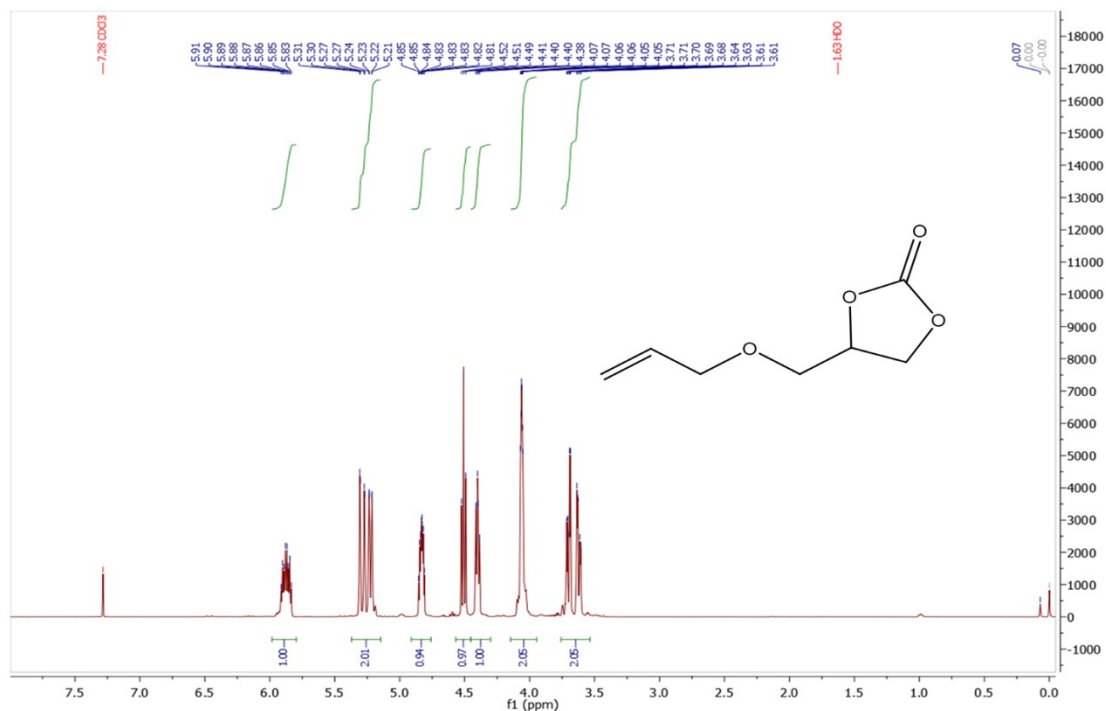

**Fig. S15:**  $^1\text{H-NMR}$  spectrum in  $\text{CDCl}_3$  of the crude product [4-((allyloxy)methyl)-1,3-dioxolan-2-one] obtained from the conversion of allyl glycidyl ether using complex **2** as a catalyst.

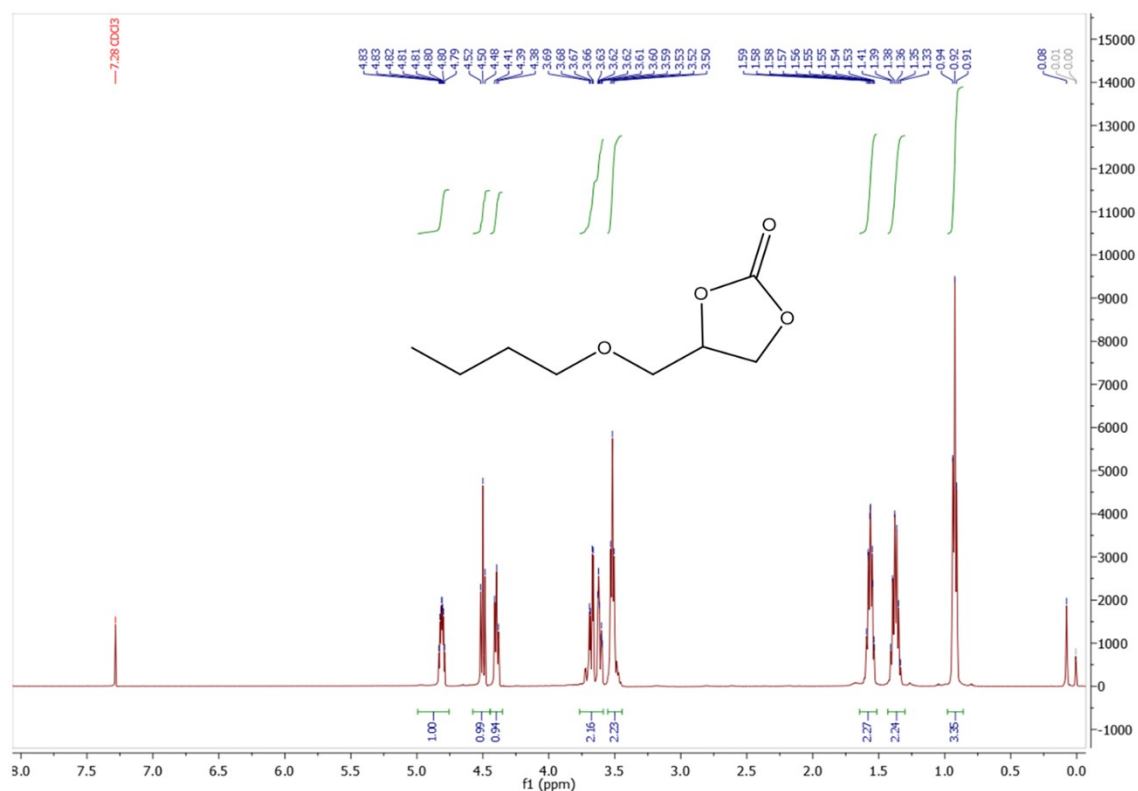

**Fig. S16:**  $^1\text{H-NMR}$  spectrum in  $\text{CDCl}_3$  of the crude product [4-(butoxymethyl)-1,3-dioxolan-2-one] obtained from the conversion of butyl glycidyl ether using complex **2** as a catalyst.

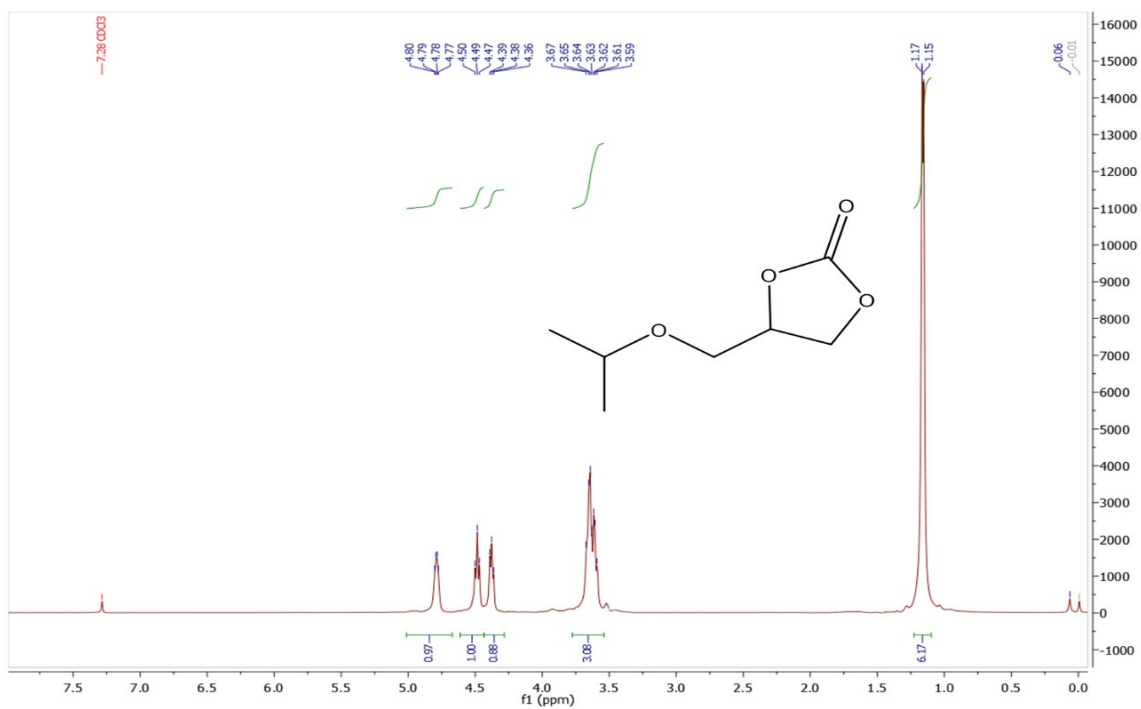

**Fig. S17:**  $^1\text{H-NMR}$  spectrum in  $\text{CDCl}_3$  of the crude product [4-(isopropoxymethyl)-1,3-dioxolan-2-one] obtained from the conversion of glycidyl isopropyl ether using complex **2** as a catalyst.

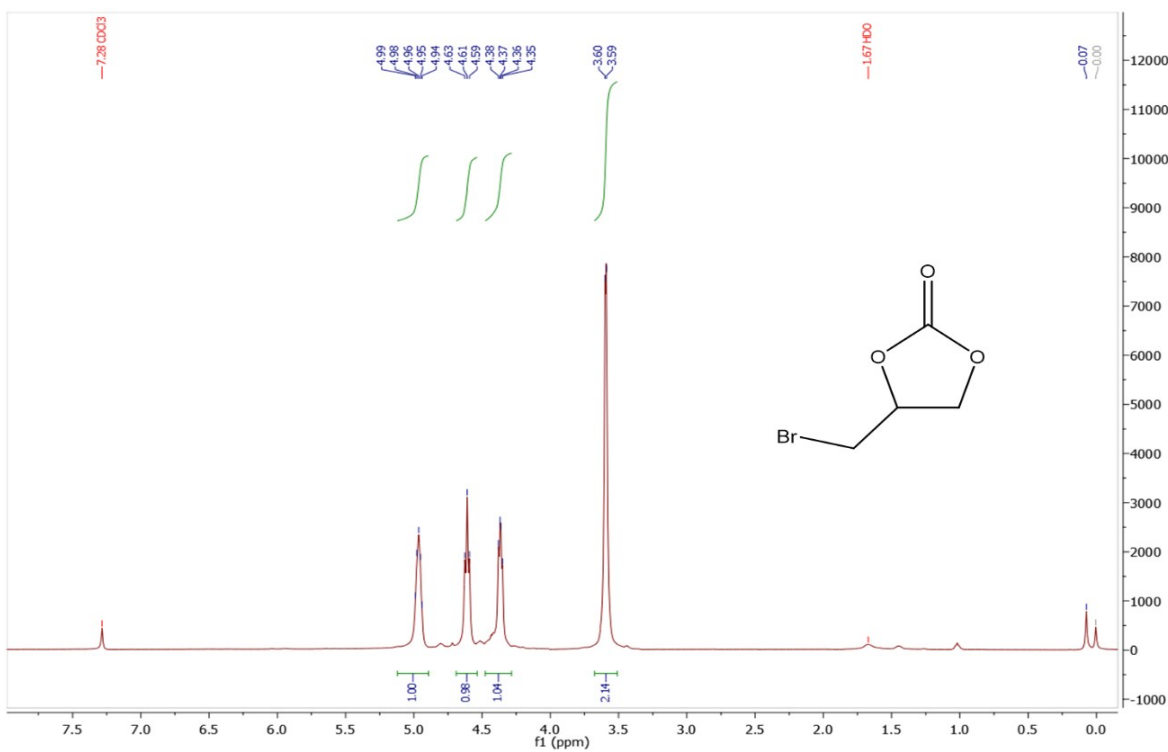

**Fig. S18:**  $^1\text{H-NMR}$  spectrum in  $\text{CDCl}_3$  of the product [4-(bromomethyl)-1,3-dioxolan-2-one] obtained from the conversion of epibromohydrin using complex **2** as a catalyst.



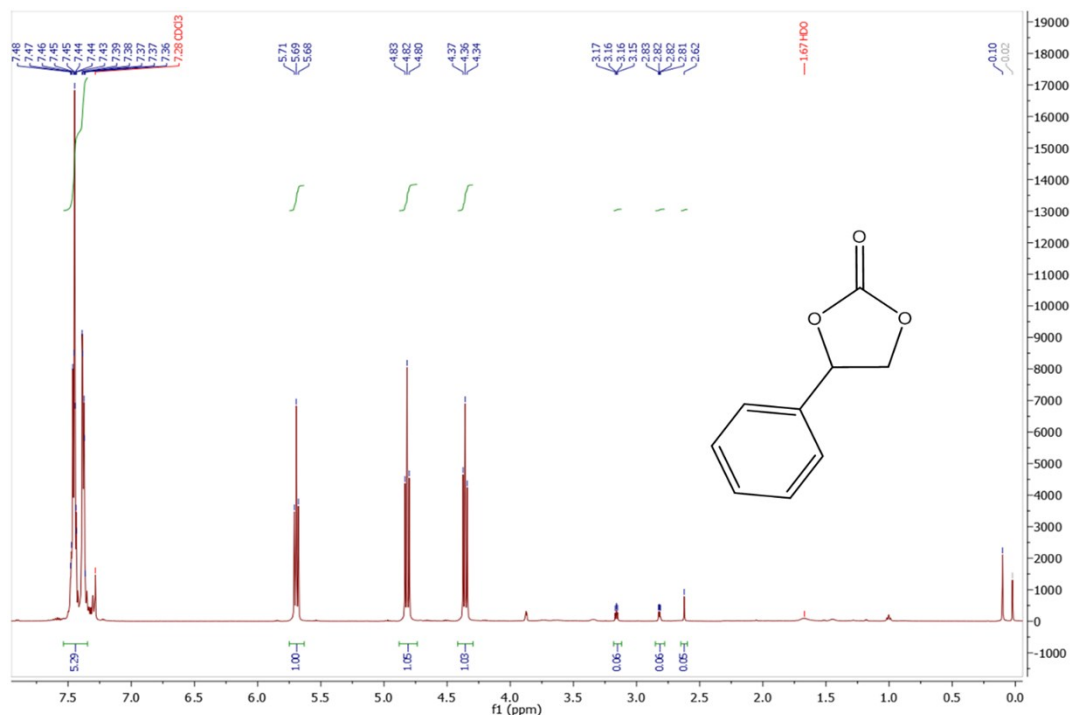

**Fig. S19:**  $^1\text{H-NMR}$  spectrum in  $\text{CDCl}_3$  of the crude product [4-phenyl]-1,3-dioxolan-2-one obtained from the conversion of styrene oxide using complex **2** as a catalyst. The small peaks in the range of 2.6 to 3.3 ppm are due to the presence of trace amount of unreacted styrene oxide.

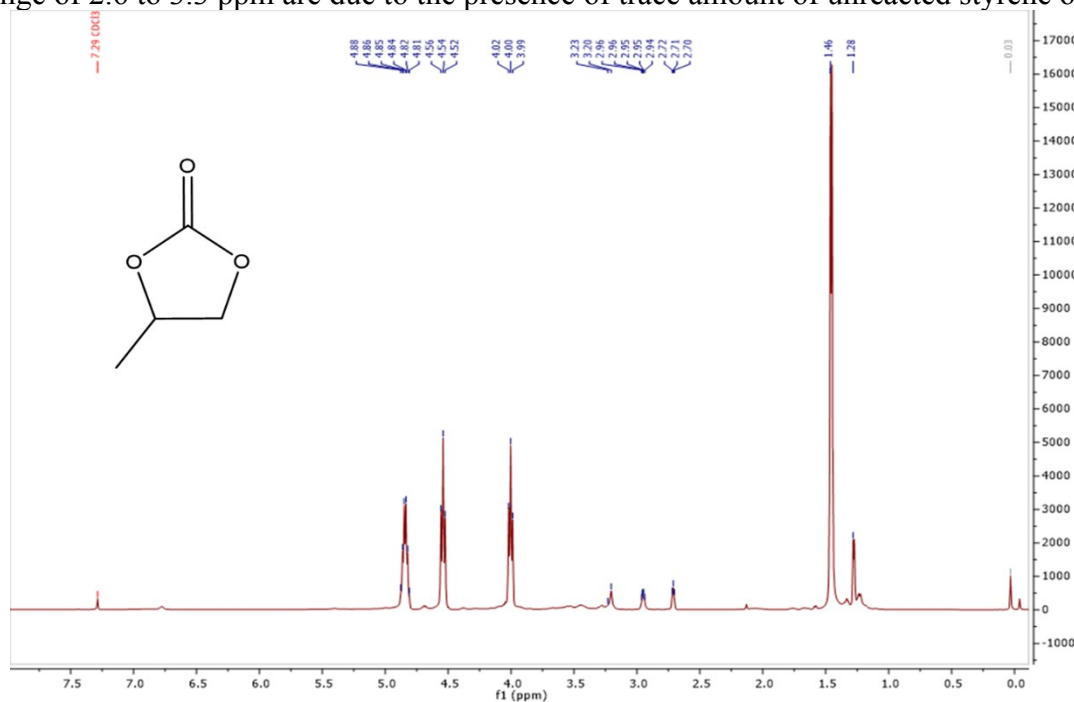

**Fig. S20:**  $^1\text{H-NMR}$  spectrum in  $\text{CDCl}_3$  of the crude product [4-methyl]-1,3-dioxolan-2-one obtained from the conversion of propylene oxide using complex **2** as a catalyst. The small peaks in the range of 2.5-3.5 and at 1.28 ppm are due to the unreacted propylene oxide (substrate).

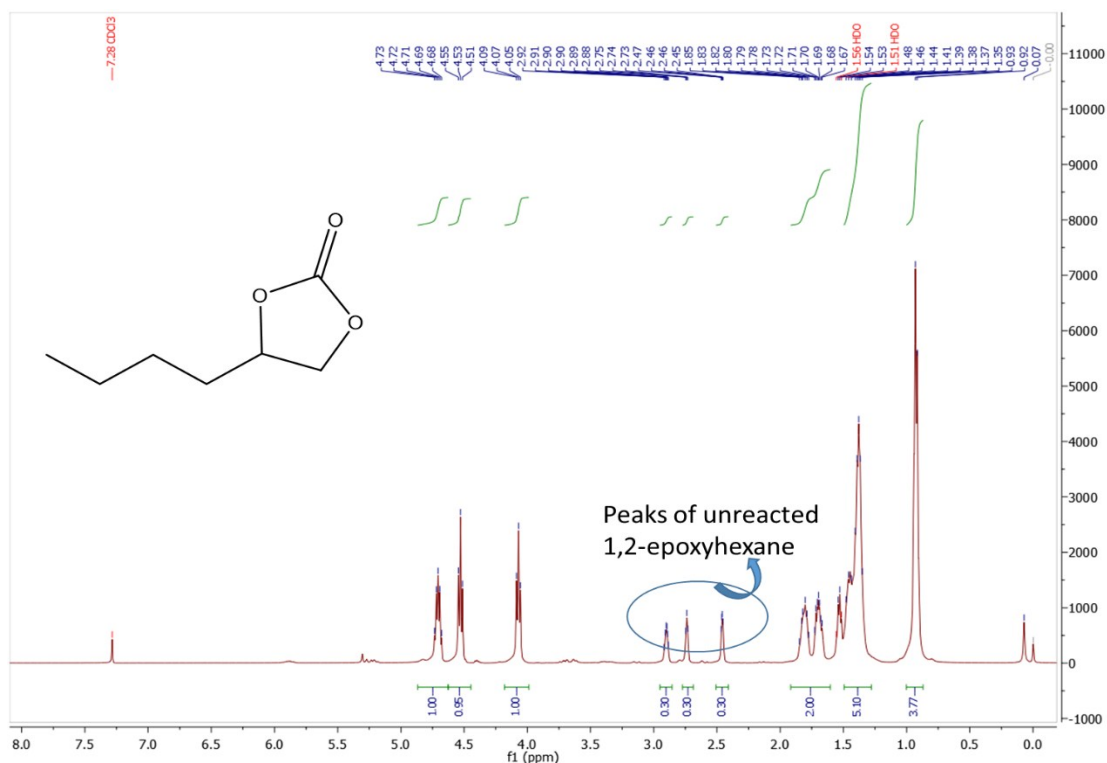

**Fig. S21:**  $^1\text{H-NMR}$  spectrum in  $\text{CDCl}_3$  of the crude product [4-butyl-1,3-dioxolan-2-one] obtained from the conversion of 1,2-epoxyhexane using complex **2** as a catalyst. The small peaks in the range of 2.4 to 2.8 ppm are due to the unreacted 1,2-epoxyhexane (substrate).

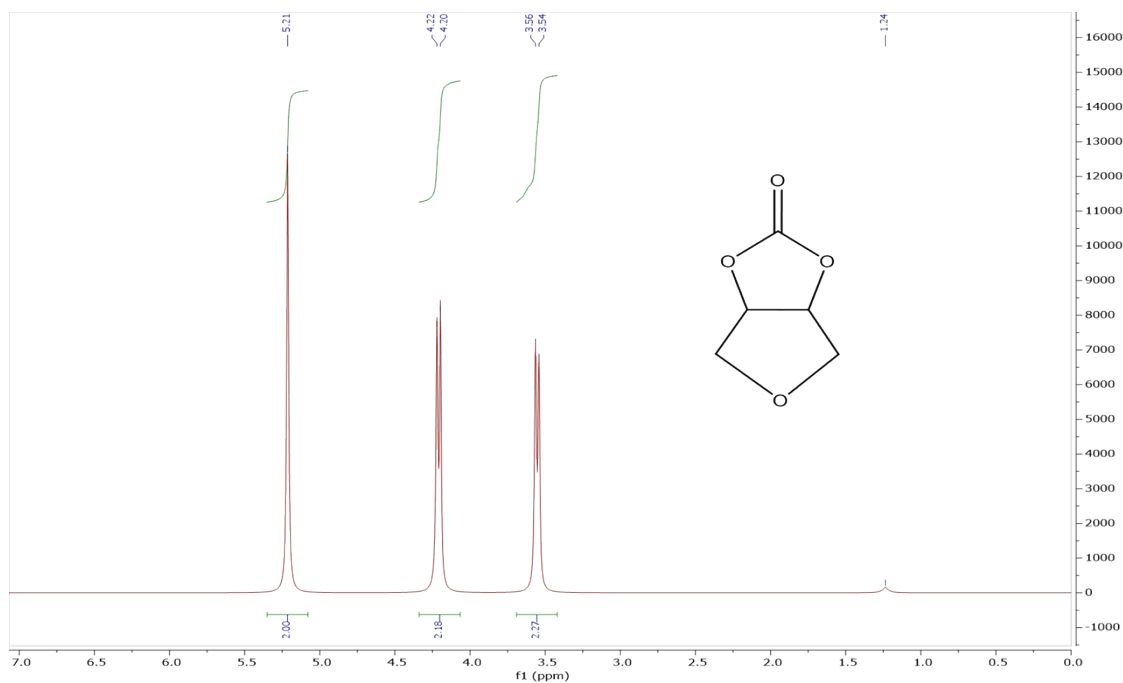

**Fig. S22:**  $^1\text{H-NMR}$  spectrum in  $\text{CDCl}_3$  of the crude product (tetrahydrofuro[3,4-d][1,3]dioxol-2-one) obtained from the conversion of 3,6-dioxabicyclo[3.1.0]hexane using complex **2** as a catalyst.

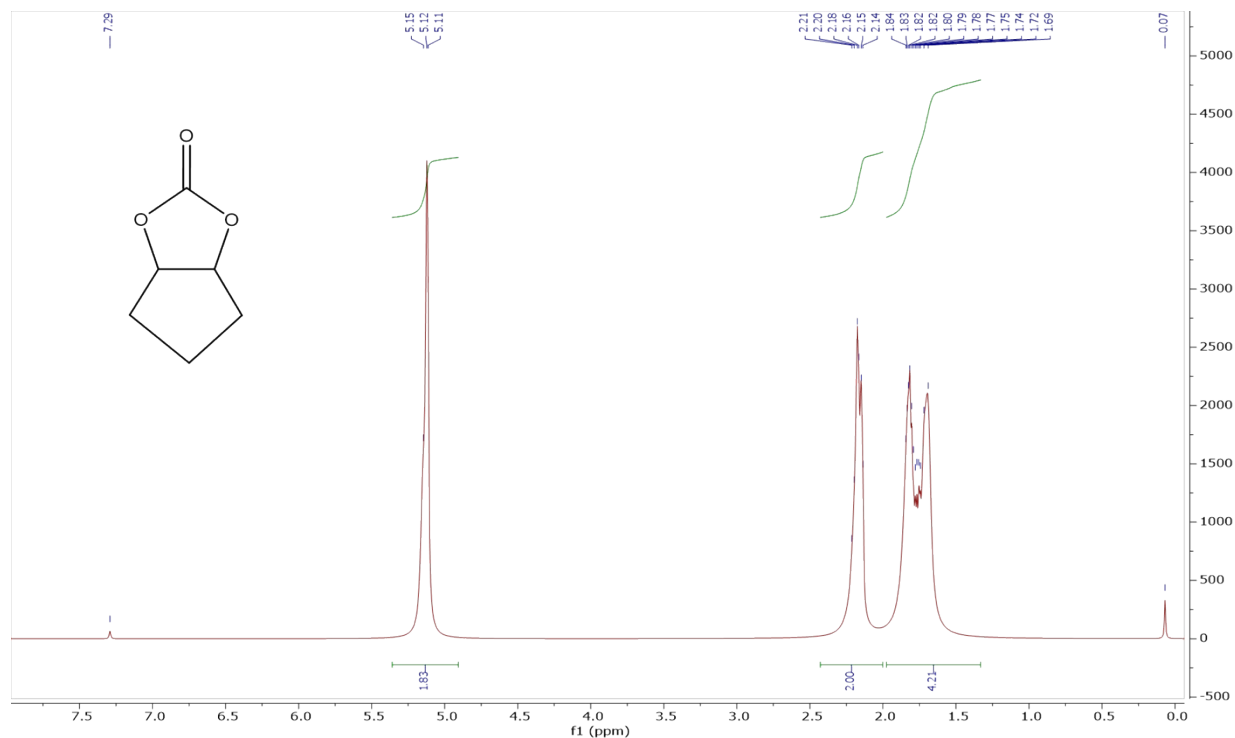

**Fig. S23:**  $^1\text{H-NMR}$  spectrum in  $\text{CDCl}_3$  of the crude product (tetrahydro-4H-cyclopenta[d][1,3]dioxol-2-one) obtained from the conversion of cyclopentene oxide using complex **2** as a catalyst.

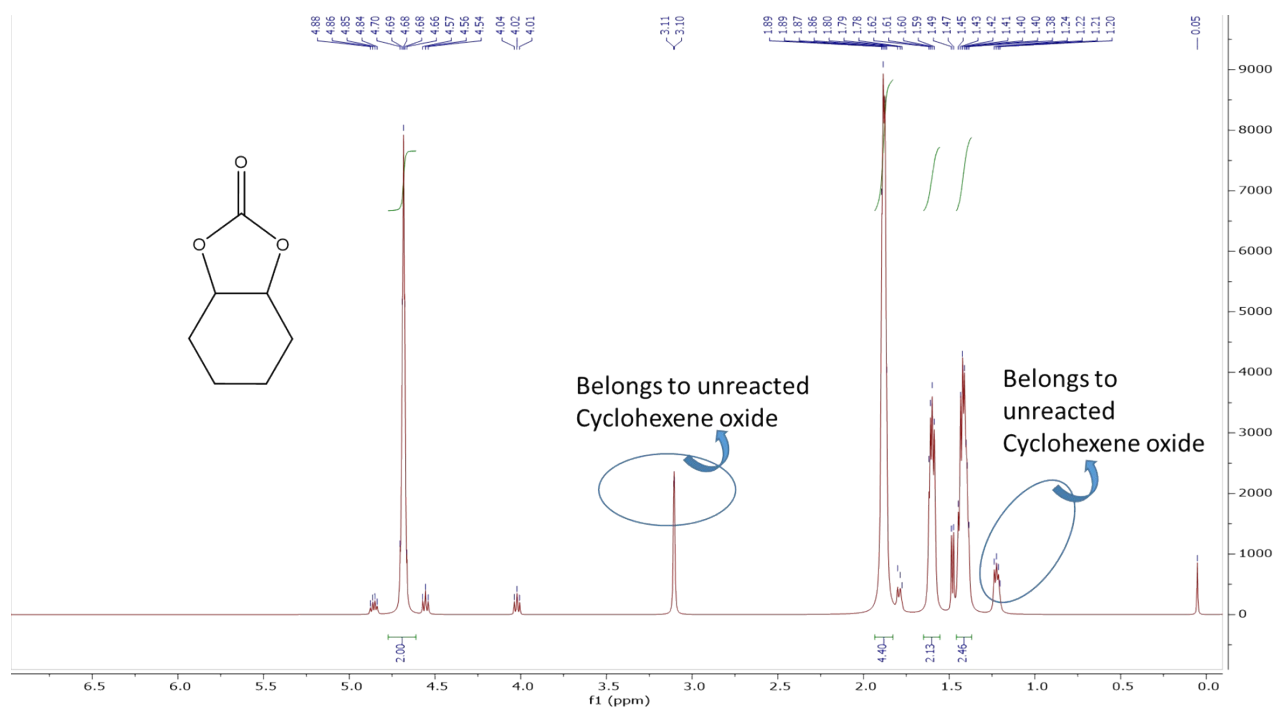

**Fig. S24:**  $^1\text{H-NMR}$  spectrum in  $\text{CDCl}_3$  of the crude product (hexahydrobenzo[d][1,3]dioxol-2-one) obtained from the conversion of cyclohexene oxide using complex **2** as a catalyst.

## 12. FTIR of the recycled complex

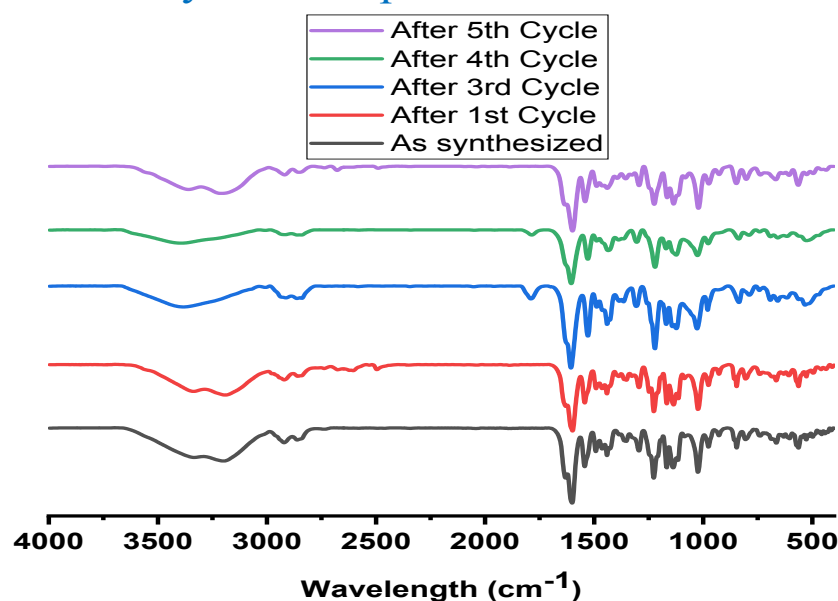

Fig. S25: FT-IR Spectra of fresh and recycled catalyst, **2**, (till five catalytic cycles).

## 13. References

- 1 (a) B. Yang, J. Pan, X. Meng, J. Cao, Y. Li, F. Xiao and D. Li, *Polyhedron*, 2016, **110**, 182; (b) D. F. Back, G. Manzoni de Oliveira, C. Mensch Canabarro and B. Almeida Iglesias, *Z. Anorg. Allg. Chem.*, 2015, **641**, 941; (c) D. F. Back, C. R. Kopp, G. Manzoni de Oliveira and P. C. Piquini, *Polyhedron*, 2012, **36**, 21.
- 2 X. Jiang, F. Gou, F. Chen and H. Jing, *Green Chem.*, 2016, **18**, 3567.
- 3 P. Ramidi, N. Gerasimchuk, Y. Gartia, C. M. Felton and A. Ghosh, *Dalton Trans.*, 2013, **42**, 13151.
- 4 L. N. Saunders, N. Ikpo, C. F. Petten, U. K. Das, L. N. Dawe, C. M. Kozak and F. M. Kerton, *Catal. Commun.*, 2012, **18**, 165.
- 5 A. Kilic, M. Ulusoy, E. Aytar and M. Durgun, *J. Ind. Engin. Chem.*, 2015, **24**, 98.
- 6 A. Ghosh, P. Ramidi, S. Pulla, S. Z. Sullivan, S. L. Collom, Y. Gartia, P. Munshi, A. S. Biris, B. C. Noll and B. C. Berry, *Catal. Lett.*, 2010, **137**, 1.
- 7 H. G. Sogukomerogullari, E. Aytar, M. Ulusoy, S. Demir, N. Dege, D. S. Richeson and M. Sönmez, *Inorg. Chim. Acta*, 2018, **471**, 290.
- 8 M. Sunjuk, A. S. Abu-Surrah, E. Al-Ramahi, A. K. Qaroush and A. Saleh, *Transition Met. Chem.*, 2013, **38**, 253.
- 9 T. Roy, R. I. Kureshy, N.-u. H. Khan, S. H. R. Abdi and H. C. Bajaj, *Catal. Sci. Technol.*, 2013, **3**, 2661.
- 10 C. J. Whiteoak, N. Kielland, V. Laserna, E. C. Escudero-Adán, E. Martin and A. W. Kleij, *J. Am. Chem. Soc.*, 2013, **135**, 1228.
- 11 Y. Qin, H. Guo, X. Sheng, X. Wang and F. Wang, *Green Chem.*, 2015, **17**, 2853.

- 12 T. Ema, Y. Miyazaki, J. Shimonishi, C. Maeda and J.-y. Hasegawa, *J. Am. Chem. Soc.*, 2014, **136**, 15270.
- 13 C. Maeda, T. Taniguchi, K. Ogawa and T. Ema, *Angew. Chem. Int. Ed.*, 2015, **54**, 134.
- 14 D. Alhashmialameer, J. Collins, K. Hattenhauer and F. M. Kerton, *Catal. Sci. Technol.*, 2016, **6**, 5364.
- 15 F. Chen, N. Liu and B. Dai, *ACS Sustain. Chem. Eng.*, 2017, **5**, 9065.
- 16 C. Maeda, J. Shimonishi, R. Miyazaki, S. J.-y. Hasegawa and T. Ema, *Chem. Eur. J.*, 2016, **22**, 6556.
